# Supplementary material
Source: PubMed Central journal article supplement (PMC1995739)
Supplement: E06-11-0993_1.pdf [file E06-11-0993_1.pdf]

**S2B**

|           |             |            |             |            |            |     |
|-----------|-------------|------------|-------------|------------|------------|-----|
| Xenopus   | MGSKE--RYH  | WQTQNVRSQS | VDDMVLLSKI  | TEEAIVDNLK | KRYMDDYIFT | 48  |
| Human     | MGSKGVYQYH  | WQSHNVKHSG | VDDMVLLSKI  | TENSIVENLK | KRYMDDYIFT | 50  |
| Mouse     | MGSKGAYRYH  | WQSHNVKHSG | VDDMVLLSKI  | TESSIVENLK | KRYMDDYIFT | 50  |
| Consensus | MGSK...RYH  | WQ..NV..SG | VDDMVLLSKI  | TE..IV.NLK | KRYMDDYIFT | 50  |
| Xenopus   | YIGPVLISVN  | PFKQLPYFTD | REIEMYQGAA  | QYENPPHIYA | LADTMYRNML | 98  |
| Human     | YIGSVLISVN  | PFKQMPYFGE | KEIEMYQGAA  | QYENPPHIYA | LADNMYRNMI | 100 |
| Mouse     | YIGSVLISVN  | PFKQMPYFGE | KEIEMYQGAA  | QYENPPHIYA | LADSMYRNMI | 100 |
| Consensus | YIG.VLISVN  | PFKQ.PYF.. | .EIEMYQGAA  | QYENPPHIYA | LAD.MYRNML | 100 |
| Xenopus   | IDGENQCVII  | SGESGAGKTV | AAKYIMGYIS  | KVSGGGPKVQ | HVKDIILKSN | 148 |
| Human     | IDRENQCVII  | SGESGAGKTV | AAKYIMSYIS  | RVSGGGTKVQ | HVKDIILQSN | 150 |
| Mouse     | IDRENQCVII  | SGESGAGKTV | AAKYIMSYVS  | RVSGGGPKVQ | HVKDIILQSN | 150 |
| Consensus | ID.ENQCVII  | SGESGAGKTV | AAKYIM.Y.S  | .VSGGG.KVQ | HVKDIIL.SN | 150 |
| Xenopus   | PLLEAFGNAK  | TVRNNNSSRF | GKYFEIQFSR  | GGEPDGGKIS | NFLEKSRVV  | 198 |
| Human     | PLLEAFGNAK  | TVRNNNSSRF | GKYFEIQFSP  | GGEPDGGKIS | NFLEKSRVV  | 200 |
| Mouse     | PLLEAFGNAK  | TVRNNNSSRF | GKYFEIQFSP  | GGEPDGGKIS | NFLEKSRVV  | 200 |
| Consensus | PLLEAFGNAK  | TVRNNNSSRF | GKYFEIQFS.  | GGEPDGGKIS | NFLEKSRVV  | 200 |
| Xenopus   | SQNSGERSFH  | IFYQVLEGAS | AEDKENLGIT  | SPDYFYLNQ  | SSVYHVEDVS | 248 |
| Human     | MRNPGERSFH  | IFYQLIEGAS | AEQKHS LGIT | SMDYYYYLSL | SGSYKVDDID | 250 |
| Mouse     | MRNPGERSFH  | IFYQLIEGAS | PEQKQSLGIT  | SMDYYYYLSL | SGSYKVDDID | 250 |
| Consensus | ..N.GERSFH  | IFYQ.IEGAS | .E.K..LGIT  | S.DYY.YL.. | S..Y.V.D.. | 250 |
| Xenopus   | DKKEFAETML  | AMNVVGLDPD | TQTSVLQIVA  | GILHLGNITF | RENGNNAEVE | 298 |
| Human     | DRREFQETLH  | AMNVIGIFAE | EQTLVLQIVA  | GILHLGNISF | KEVGNAAAVE | 300 |
| Mouse     | DKRDFQETLH  | AMNVIGIFSE | EQTLVLQIVA  | GILHLGNISF | KEVGNAAAVE | 300 |
| Consensus | D..EF.ET..  | AMNV.G.... | .QT.VLQIVA  | GILHLGNI.F | .E.GN.A.VE | 300 |
| Xenopus   | SQDFLAFPSY  | LLGIDQMRLO | EKLTSRKMDS  | KWGGKSEVID | VTLNAEQACF | 348 |
| Human     | SEEFLAFPAY  | LLGINQDRLK | EKLTSRQMDS  | KWGGKSESIH | VTLNVEQACY | 350 |
| Mouse     | SEEFLAFPAY  | LLGINQDRLK | EKLTSRQMDS  | KWGGKSESIH | VTLNVEQACY | 350 |
| Consensus | S..FLAFP.Y  | LLGI.Q.RL. | EKLTSR.MDS  | KWGGKSE.I. | VTLN.EQAC. | 350 |
| Xenopus   | TRDALAKALY  | SRLFYDLVEA | INKAMRKEAE  | EYNIGVLDIY | GFEIFQKNGF | 398 |
| Human     | TRDALAKALH  | ARVDFDLVDS | INKAMEKDHE  | EYNIGVLDIY | GFEIFQKNGF | 400 |
| Mouse     | TRDALAKALH  | ARVDFDLVDS | INKAMEKDHE  | EYNIGVLDIY | GFEIFQKNGF | 400 |
| Consensus | TRDALAKAL.  | .R.FD.LV.. | INKAM.K..E  | EYNIGVLDIY | GFEIFQKNGF | 400 |
| Xenopus   | EQFCINRVNE  | KLQQIFIELT | LKAEQEEYVQ  | EGIHWNPIEY | FNNKVVCDLI | 448 |
| Human     | EQFCINRVNE  | KLQQIFIELT | LKAEQEEYVQ  | EGIRWTPIEY | FNNKIVCDLI | 450 |
| Mouse     | EQFCINRVNE  | KLQQIFIELT | LKAEQEEYVQ  | EGIRWTPIEY | FNNKIVCDLI | 450 |
| Consensus | EQFCINRVNE  | KLQQIFIELT | LKAEQEEYVQ  | EGI.W.PIEY | FNNK.VCDLI | 450 |
| Xenopus   | ENKVNPPGVM  | SILDDVCATM | HAKGEGADQT  | LLQKLQSAIG | SHEHFNSWNK | 498 |
| Human     | ENKVNPPGIM  | SILDDVCATM | HAVGEGADQT  | LLQKLQMQIG | SHEHFNSWNQ | 500 |
| Mouse     | ESKVNPPGIM  | SILDDVCATM | HAVGEGADQT  | LLQKLQMQIG | SHEHFNSWNQ | 500 |
| Consensus | ENKVNPPG.M  | SILDDVCATM | HA.GEGADQT  | LLQKLQ..IG | SHEHFNSWN. | 500 |
| Xenopus   | GFIIHHYAGK  | VSVDVNGFCE | RNRDVLFTDL  | IELMQSSEIP | FIRERFPENL | 548 |
| Human     | GFIIHHYAGK  | VSYDMDFCE  | RNRDVLFMDL  | IELMQSSELP | FIKSLFPENL | 550 |
| Mouse     | GFIIHHYAGK  | VSYDMDFCE  | RNRDVLFMDL  | IELMQSSELP | FIKSLFPENL | 550 |
| Consensus | GFIIHHYAGK  | VSYD..GFCE | RNRDVL.F.DL | IELMQSSELP | FI...FPENL | 550 |
| Xenopus   | NAEKKGRPST  | AGTKIKKQAN | DLVQTLMKCT  | PHYIRCIKPN | ETKKPRDWED | 598 |
| Human     | QADKKGRPST  | AGSKIKKQAN | DLVSTLMKCT  | PHYIRCIKPN | ETKKPRDWE  | 600 |
| Mouse     | QADKKGRPST  | AGSKIKKQAN | DLVSTLMKCT  | PHYIRCIKPN | ETKKPKDWE  | 600 |
| Consensus | .A.KKGRP.T  | AG.KIKKQAN | DLV.TLMKCT  | PHYIRCIKPN | ETKKPRDWE. | 600 |
| Xenopus   | SRVKHQVEYL  | GLRENIRVRR | AGYAYRRVFQ  | KFLHRYAILT | RETWPRWGD  | 648 |
| Human     | SRVKHQVEYL  | GLKENIRVRR | AGYAYRRIFQ  | KFLQRYAILT | KATWPSWQGE | 650 |
| Mouse     | SRVKHQVEYL  | GLKENIRVRR | AGYAYRRVFQ  | KFLQRYAILT | KATWPVWRGD | 650 |
| Consensus | SR.KHQVEYL  | GL.ENIRVRR | AGYAYRR.FQ  | KFL.RYAILT | ..TWP.W.G. | 650 |
| Xenopus   | EKKGVIIHLLR | SVNMDSQYQ  | LGRTKVFIKA  | PESLFLLEEM | RERKYDNYAR | 698 |
| Human     | EKQGVLHLLQ  | SVNMDSQFQ  | LGRSKVFIKA  | PESLFLLEEM | RERKYDGYAR | 700 |
| Mouse     | EKQGVLHLLQ  | SVNMDSQFQ  | LGRSKVFIKA  | PESLFLLEEM | RERKYDGYAR | 700 |
| Consensus | EK.GVLHLL.  | SVNMDSQ.Q  | LGR.KVFIKA  | PESLFLLEEM | RERKYD.YAR | 700 |

**S2B (continue)**

|           |             |            |            |            |            |      |
|-----------|-------------|------------|------------|------------|------------|------|
| Xenopus   | VIQKAWRKHT  | AVRKYIRMRE | EASSIVLNQK | ERRRNSINRN | FVGDYIGMDS | 748  |
| Human     | VIQKSWRKVF  | ARKKYVQMRE | EASDLLLNKK | ERRRNSINRN | FIGDYIGMEE | 750  |
| Mouse     | VIQKTWRKFV  | ARKKYVQMRE | EASDLLLNKK | ERRRNSINRN | FIGDYIGMEE | 750  |
| Consensus | VIQK.WRK..  | A..KY..MRE | EAS...LN.K | ERRRNSINRN | F.GDYIGM.. | 750  |
| Xenopus   | RPELQQFVGR  | RERIDFADIV | TKYDRRFKTL | KRDMVLTPKF | LYLIGREKVK | 798  |
| Human     | HPELQQFVGK  | REKIDFADTV | TKYDRRFKGV | KRDLLLTTPK | LYLIGREKVK | 800  |
| Mouse     | RPELQQFVGK  | REKIDFADTV | TKYDRRFKGV | KRDLLLTTPK | LYLIGREKVK | 800  |
| Consensus | .PEL.QFVG.  | RE.IDFAD.V | TKYDRRFK.. | KRD..LTPK. | LYLIGREKVK | 800  |
| Xenopus   | QGPEKGLIKE  | VLKRKIEVEN | IQSVSMKLO  | DDFILHEAQ  | YDSVLETMFK | 848  |
| Human     | QGPDKGLVKE  | VLKRKIEIER | ILSVSLSTMQ | DDIFILHEQE | YDSLLESVFK | 850  |
| Mouse     | QGPDKGVVKE  | VLKRRIEVER | ILSVSLSTMQ | DDIFILHEQE | YDSLLESVFK | 850  |
| Consensus | QGP.KG..KE  | VLKR.IE.E. | I.SVS.S..Q | DD..ILHE.. | YDS.LE..FK | 850  |
| Xenopus   | TEFLSLLYKR  | YEEKKQKKLP | IKFSNQLEFK | VKKEGWAPWG | AAGTRQIQFQ | 898  |
| Human     | TEFLSLLAKR  | YEEKTQKQLP | LKFSNTLELK | LKKENWGPWS | AGGSRQVQFH | 900  |
| Mouse     | TEFLSLLAKR  | YEEKTQKQLP | LKFSNTLELK | LKKENWGPWS | AGGSRQVQFH | 900  |
| Consensus | TEFLSLL.KR  | YEEK.QK.LP | .KFSN.LE.K | .KKE.W.PW. | A.G.RQ.QF. | 900  |
| Xenopus   | NGIGDMALTK  | INGKVLVISI | GQGLPPNSRP | TRKDN----- | -----      | 933  |
| Human     | QGFGLAVLK   | PSNKVLQVSI | GPGLPKNSRP | TRRNTTQNTG | YSSGTQNY   | 950  |
| Mouse     | QGFGLAILK   | PSNKVLQVSI | GPGLPKNSRP | TRRNTVTSRG | YPGGTKN-NY | 949  |
| Consensus | .G.GD.A..K  | ...KVL.VSI | G.GLP.NSRP | TR...----- | -----      | 950  |
| Xenopus   | --R-----    | -----KSQ   | YLSSTPA-GN | QRANGGN--K | KSSRPPMLQR | 964  |
| Human     | PVRAAPPPG   | YHONGVIRNQ | YVPYPHAPGS | QRSNQKSLYT | SMARPPLPRQ | 1000 |
| Mouse     | PMRAAPPPG   | CHONGVIRNQ | FVPPPHAFGN | QRSNQKSLYT | SMARPPLPRQ | 999  |
| Consensus | --R-----    | -----..Q   | .....A-G.  | QR.N.....  | ...RPP.... | 1000 |
| Xenopus   | MSFTSRQLSV  | EQPTLPRQGA | SPRAKAPPTP | VNLDFMNVDP | QGTAGILRRR | 1014 |
| Human     | QSTSSDRVS-  | -----      | -----QTP   | ESLDFLKVPD | QGAAGV--RR | 1030 |
| Mouse     | QSTGSDRLS-  | -----      | -----QTP   | ESLDFLKVPD | QGVAGV--RR | 1029 |
| Consensus | .S..S...S.  | .....      | .....TP    | ..LDF..VPD | QG.AG...RR | 1050 |
| Xenopus   | SKEVKVPPGG  | GRSKPAPKPK | PQPALPLCRA | LYAYDAQDTD | ELSFNANDQL | 1064 |
| Human     | QTTSRPPPPAG | GRPKPQPKPK | PQ--VPQCKA | LYAYDAQDTD | ELSFNANDII | 1078 |
| Mouse     | QTTSRPPPPAG | GRPKPQPKPK | PQ--VPQCKA | LYAYDAQDTD | ELSFNANDII | 1077 |
| Consensus | .....P.P.G  | GR.KP.PKPK | PQ...P.C.A | LYAYDAQDTD | ELSFNAND.. | 1100 |
| Xenopus   | EIVREDPSGW  | WQGRIRGREG | LFPNGYVEKI |            | 1094       |      |
| Human     | DIIKEDPSGW  | WTGRLRGKQG | LFPNNYVTKI |            | 1108       |      |
| Mouse     | DIIKEDPSGW  | WTGRLRGKQG | LFPNNYVTKI |            | 1107       |      |
| Consensus | .I..EDPSGW  | W.GRLRG..G | LFP.NYV.KI |            | 1130       |      |

**Supplementary Figure - 2B (Yu)**
